# Supplementary material
Source: Elsevier journal article supplement (https://www.sciencedirect.com/science/article/pii/S2530064422000013)
Supplement: mmc2 [file S2530064422000013:mmc2.docx]

**Table S2.** The average number of pixels that overlap with ecosystems, the proportional overlap of the total ecosystem area provided from Natural Regions of Ecuador (Ron, 2020) and, percentage of modelled area and average loss or gain of the area size for all scenarios (Present, ACCESS 1.0 & HadGEM2-ES).

|  | Present | | ACC45 | | | ACC85 | | | HGE45 | | | HGE85 | | |
| --- | --- | --- | --- | --- | --- | --- | --- | --- | --- | --- | --- | --- | --- | --- |
| Ecosystem | **Overlap (ecosystem prop)** | **% Modelled area** | **Overlap (ecosystem prop)** | **% Modelled area** | **(- LOSS/ + WIN)** | **Overlap (ecosystem prop)** | **% Modelled area** | **(- LOSS/ + WIN)** | **Overlap (ecosystem prop)** | **% Modelled area** | **(- LOSS/ + WIN)** | **Overlap (ecosystem prop)** | **% Modelled area** | **(- LOSS/ + WIN)** |
| Andean Shrub | 3373 (0.26) | 7,18 | 3527 (0.27) | 8,48 | + 4,5% | 3912 (0.30) | 10,21 | + 16,0% | 3421 (0.26) | 10,34 | + 1,4% | 3197 (0.24) | 9,20 | - 5,2% |
| Amazon | 2568 (0.03) | 2,47 | 1400 (0.02) | 1,55 | - 45,4% | 2004 (0.02) | 1,92 | - 22% | 10975 (0.13) | 6,49 | + 327,3% | 9628 (0.11) | 5,80 | + 274,9% |
| Western Montane | 3212 (0.13) | 3,22 | 2834 (0.11) | 3,18 | - 11,8% | 3329 (0.13) | 4,04 | + 3,6% | 4858 (0.19) | 5,66 | + 51,3% | 4861 (0.19) | 6,51 | + 51,3% |
| Western Foothill | 474 (0.03) | 0,40 | 182 (0.01) | 0,16 | - 61,5% | 169 (0.01) | 0,14 | - 64,2% | 607 (0.03) | 0,35 | + 28,1% | 461 (0.03) | 0,28 | - 2,7% |
| Paramo | 3017 (0.16) | 3,73 | 3677 (0.20) | 7,08 | + 21,9% | 4138 (0.22) | 7,60 | + 37,2% | 5998 (0.32) | 12,65 | + 98,8% | 6193 (0.33) | 15,72 | + 105,3% |
| Eastern Foothill | 4854 (0.32) | 8,58 | 3318 (0.22) | 5,31 | - 31,6% | 3572 (0.23) | 6,14 | - 26,4% | 3359 (0.22) | 2,98 | - 30,8% | 2921 (0.19) | 2,59 | - 39,8% |
| Eastern Montane | 20141(0.55) | 74,20 | 17085 (0.47) | 73,90 | - 15,2% | 18462 (0.50) | 69,63 | - 8,3% | 15416 (0.42) | 61,31 | - 23,5% | 14409 (0.39) | 59,83 | - 28,5% |
| Dry Shrub | 0 (0.00) | 0,00 | 0 (0.00) | 0,00 | 0,0% | 0 (0.00) | 0,00 | 0,0% | 217 (0.02) | 0,11 | + 0,0% | 71 (0.01) | 0,04 | 0,0% |
| Deciduous Forest | 270 (0.01) | 0,21 | 332 (0.01) | 0,34 | + 23 % | 332 (0.01) | 0,32 | + 22,9% | 201 (0.01) | 0,10 | - 25,6% | 59 (0.00) | 0,03 | - 78,1% |
| Choco Tropical Rainforest | 17 (0.00) | 0,01 | 0 (0.00) | 0,00 | - 100 % | 0 (0.00) | 0,00 | - 100% | 21 (0.00) | 0,01 | + 26,0% | 6 (0.00) | 0,00 | - 65,7% |
